# Supplementary material for: Evaluation of Two Serological Assays for Diagnosing Zika Virus Infection
Source: MDPI journal article supplement (doi:10.3390/diagnostics11091696), 2021-09-17
Supplement: s1 [file s1]

**Table S1.** Cross-reactivity evaluation of the microneutralization test (MNT) and plaque reduction neutralization test (PRNT) using a set of 38 DENV-positive serum samples

| Serum samples positive for: | ZIKV MNT and PRNT   |                    |
|-----------------------------|---------------------|--------------------|
|                             | Positive<br>% (n/N) | Negative<br>%(n/N) |
| DENV-1                      | 0.0 (0/10)          | 100.0 (10/10)      |
| DENV-2                      | 0.0 (0/10)          | 100.0 (10/10)      |
| DENV-3                      | 0.0 (0/10)          | 100.0 (10/10)      |
| DENV-4                      | 0.0 (0/8)           | 100.0 (8/8)        |

Note: DENV infection was confirmed by at least one of the following methods; real-time qRT-PCR, viral isolation + immunofluorescence assay, or seroconversion determined by IgM against DENV considering a titer increase of  $\geq 4$ -fold.

**Table S2.** Receiver operating characteristic analysis and its detailed report of the MAC-ELISA performance for several potential cut-off values

| Cut-off | Sensitivity (%) | Specificity (%) | Correctly classified (%) |
|---------|-----------------|-----------------|--------------------------|
| 0.173   | 93.5            | 85.7            | 88.5                     |
| 0.202   | 93.5            | 90.5            | 90.4                     |
| 0.208   | 93.5            | 95.2            | 94.2                     |
| 0.214   | 93.5            | 100.0           | 96.2                     |
| 0.476   | 90.3            | 100.0           | 94.2                     |
